# Supplementary material for: Anti-cancer mechanisms of action of therapeutic alternating electric fields (tumor treating fields [TTFields])
Source: PubMed Central journal article supplement — J Mol Cell Biol. 2022 Aug 16;14(8):mjac047. doi: 10.1093/jmcb/mjac047 (PMC9912101; doi:10.1093/jmcb/mjac047), 2022-08-16
Supplement: mjac047_supplemental_file.pdf [file mjac047_supplemental_file.pdf]

**Supplementary materials (3 supplementary figures and 4 supplementary tables)**

S. Shams and C. B. Patel. Anti-cancer mechanisms of action of therapeutic alternating electric fields (tumor treating fields [TTFields]). *Journal of Molecular Cell Biology*, mjac047, <https://doi.org/10.1093/jmcb/mjac047> . Published: 16 August 2022

Supplementary materials available online:

<https://academic.oup.com/jmcb/advance-article/doi/10.1093/jmcb/mjac047/6668799#supplementary-data>

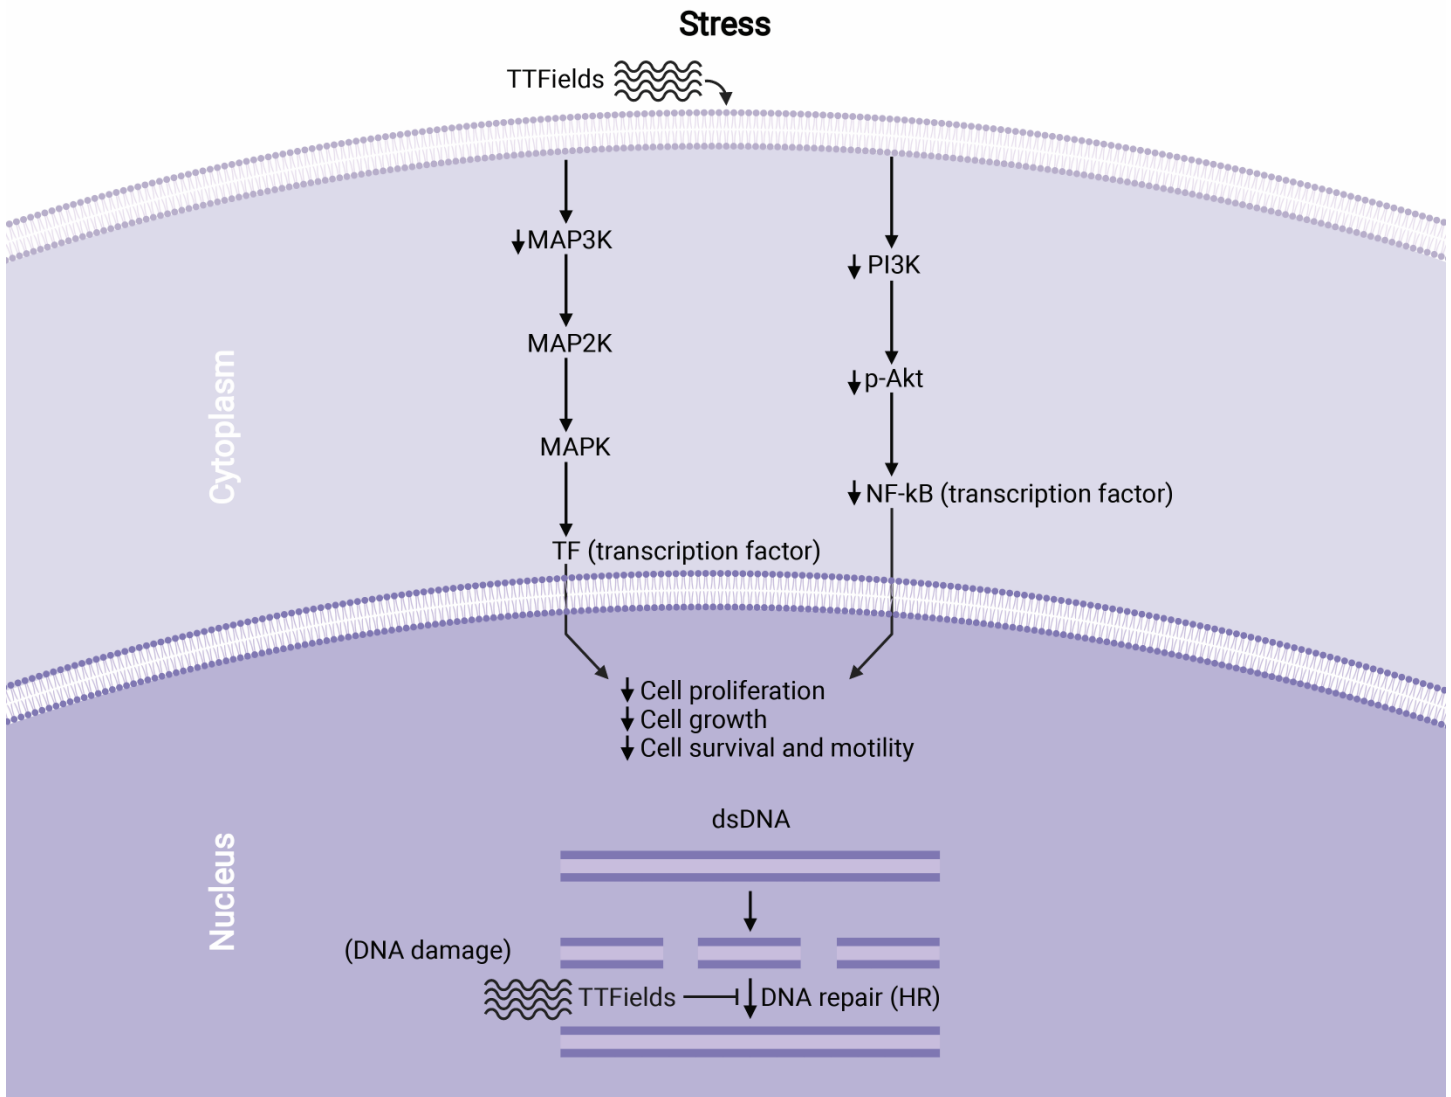

Supplementary Figure 1: TTFields hinders cancer cell growth and proliferation through interference with normal intracellular signaling pathways. TTFields induced alteration in the cytosolic signaling pathways, combined with its intranuclear DNA damaging effects and interference with DNA damage repair, lead to reduced cancer cell proliferation, growth, survival, and motility.

# Apoptosis pathway

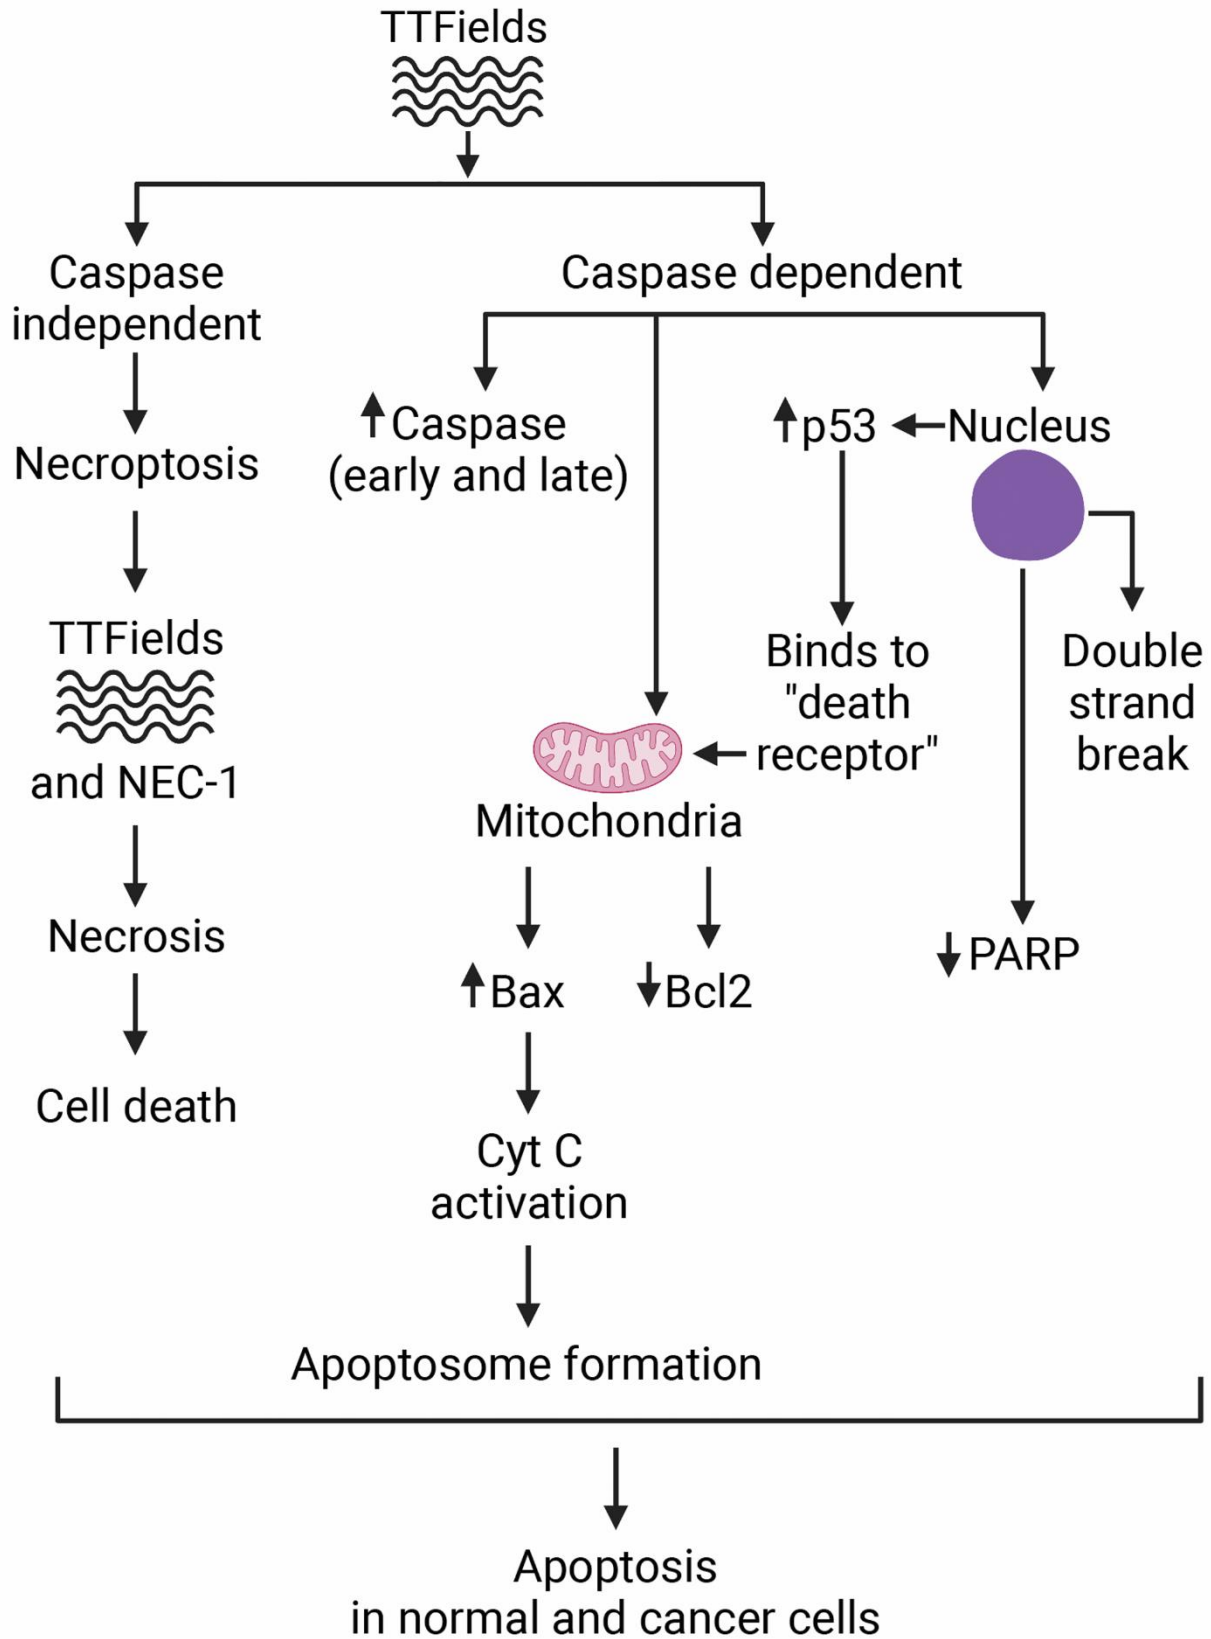

Supplementary Figure 2: TTFIELDS induces cancer cell death via caspase independent (e.g., necroptosis) and caspase dependent pathways.

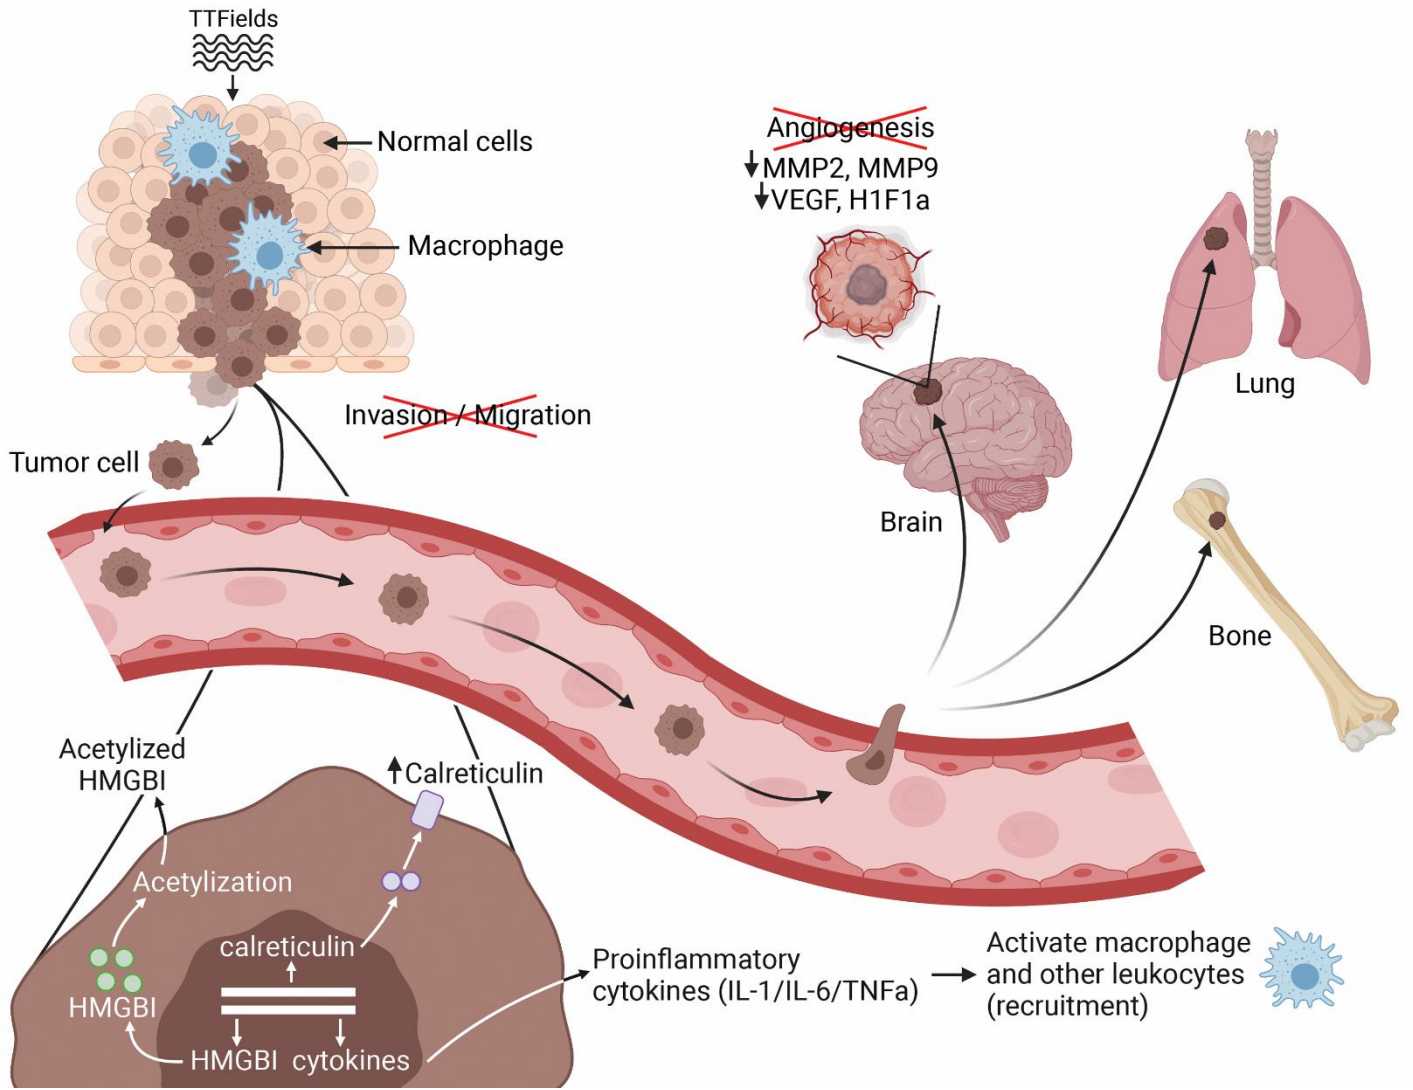

Supplementary Figure 3: TTFields exposure interferes with cancer cell mediated angiogenesis, impairs invasion and migration (thereby potentially reducing the likelihood of metastasis), and upregulates proinflammatory signaling and immune cell recruitment (which further aids in detecting and clearing cancer cells from adjacent non-cancer tissues).

**Supplementary Table 1:** Optimal anti-proliferative TTFields frequencies for various cancer cell types as reported in the literature

| <b>Cell line(s) studied</b>                                                       | <b>TTFields frequency (kHz)</b>     |
|-----------------------------------------------------------------------------------|-------------------------------------|
| Human glioblastoma (U87-MG*, A172, LN229**, U-118MG, NCI-H2052, GaMG, T98G, U251) | 200 (*also 100 and 150; **also 100) |
| Human glioblastoma cells (MZ-54)                                                  | 250                                 |
| Human glioblastoma cells (GBM2, GBM39)                                            | 240                                 |
| Human long-term glioma cell (LTC) (LN-18, LN-428, LN-319, A172, T98G, LN-308)     | 100                                 |
| Human glioblastoma (KNS42)                                                        | 200                                 |
| Human glioblastoma (SF188)                                                        | 400                                 |
| Human glioblastoma (GIN-31)                                                       | 200                                 |
| Human glioblastoma (U373)                                                         | 150                                 |
| Human glioblastoma (2H11)                                                         | 150                                 |
| Human Medulloblastoma (DAOY)                                                      | 300                                 |
| Human Medulloblastoma (UW228-3)                                                   | 100                                 |
| Human Ependymoma (DKFZ-EPN1)                                                      | 100                                 |
| Human Ependymoma (BXD-1425EPN)                                                    | 200                                 |
| Human Non-small Cell Lung Cancer (H1299)                                          | 100, 150                            |
| Human Non-small Cell Lung Cancer (H157)                                           | 100                                 |
| Human Non-small Cell Lung Cancer (H1650)                                          | 100                                 |
| Human squamous cell carcinoma (HTB-182)                                           | 150                                 |
| Human adenocarcinoma (HCC827)                                                     | 150                                 |
| Human Non-small Cell Lung Cancer (H4006)                                          | 150                                 |
| Lung Adenocarcinoma (A549)                                                        | 150, 200                            |
| Human fibroblast (PCS-201)                                                        | 200                                 |
| Human breast carcinoma (MDA-MB231)                                                | 150                                 |
| Human breast cancer (BT-549)                                                      | 150                                 |
| Human breast adenocarcinoma (MCF-7)                                               | 150                                 |
| Human breast ductal carcinoma (JIMT-1 and BT-474)                                 | 150                                 |
| Mouse melanoma (B16F1)                                                            | 100                                 |
| Human non-small-cell lung carcinoma (H1299)                                       | 200                                 |
| Rat glioma (F-98)                                                                 | 150                                 |
| Human biphasic mesothelioma (MSTO-211H) and NCI-H2052                             | 150                                 |
| Murine squamous cell carcinoma (KLN-205)                                          | 150                                 |
| Murine Lewis lung carcinoma (LLC-1)                                               | 150                                 |
| Human pancreatic adenocarcinoma (AsPC-1, BxPC-3, BxGem)                           | 150                                 |
| Nonmalignant human hTERT-HPNE immortalized pancreatic duct cell line CRL-4023     | 150                                 |
| Hamster pancreatic adenocarcinoma (PC-1.0)                                        | 200                                 |
| Human ovarian carcinoma (A2780)                                                   | 200                                 |
| Human ovarian adenocarcinoma (OVCAR-3 (HTB-161) and Caov-3 (HTB-75))              | 150                                 |
| Human cervical adenocarcinoma HeLa (Tubulin-GFP)                                  | 120, 150, 200                       |

|                                                                                                                                             |                                  |
|---------------------------------------------------------------------------------------------------------------------------------------------|----------------------------------|
| Cervical adenocarcinoma (HeLa)                                                                                                              | 150                              |
| Patient-derived glioblastoma stem cells (528NS and 83NS) in vivo primary cells                                                              | 200                              |
| rat glioma BT4Ca                                                                                                                            | 100                              |
| Human GIC (ZH-161, T-325, T-269, S-24, ZH-305)                                                                                              | 150                              |
| Murine mammary carcinoma cells (4T1)                                                                                                        | 150                              |
| Human melanoma (A375SM)                                                                                                                     | 150                              |
| Human skin normal cells (CCD-986sk)                                                                                                         | 150                              |
| Mouse melanoma cells (B16F10)                                                                                                               | 150                              |
| Mouse embryo cells (NIH3T3)                                                                                                                 | 150                              |
| Human colorectal cancer (HCT116, HT29, SW620)                                                                                               | 200                              |
| GBM stem-like cells (GSCs): MGMT expressing (TMZ resistant: 12.1 (rGBM) and 22 GSC) and non-MGMT expressing (TMZ sensitive: 33 and 114 GSC) | 150                              |
| Lewis lung carcinoma (LLC-1)                                                                                                                | 200                              |
| Murine colon carcinoma (CT-26 )                                                                                                             | 200                              |
| Spontaneously transformed murine ovarian surface epithelial (MOSE-L)                                                                        | 150                              |
| Human hepatocellular carcinoma (HEPG2)                                                                                                      | 150                              |
| Human lung squamous cell carcinoma (H520)                                                                                                   | 150                              |
| Bone marrow-derived Dendritic Cells (BMDCs)                                                                                                 | 150                              |
| Human umbilical vein endothelial cells (HUVECs)                                                                                             | 150                              |
| Murine squamous cell carcinoma (KLN205)                                                                                                     | 150                              |
| A clonal derivative (C11) of parental Chinese hamster ovary AA8 cells and their emetine-resistant sub-line EmtR1                            | 150 (6.58 V/cm), 200 (1.33 V/cm) |
| Yeast cells with fluorescence tagged (Nop65)                                                                                                | 120                              |
| Normal Lung fibroblast (HEL299)                                                                                                             | 120                              |
| Hepatocellular carcinoma (Huh7)                                                                                                             | 150                              |
| Normal intestinal epithelial (IEC-6)                                                                                                        | 150                              |
| Human Osteosarcoma (U2OS, KHOS/NP)                                                                                                          | 150                              |
| Murine endothelial (2H11)                                                                                                                   | 150                              |
| Pancreatic Cancer cell lines (CFPAC-I and HPAF-II)                                                                                          | 200                              |
| Bone marrow derived dendritic cells (BMDCs) and splenic T-cells                                                                             | 200                              |
| Glioblastoma Stem Cells (NCH644, GBM1, BTSC233, JHH520, SF188)                                                                              | 200                              |
| Peripheral blood mononuclear cell (PBMC)                                                                                                    | 200                              |
| CAG multiple myeloma                                                                                                                        | 200                              |

**Supplementary Table 2:** Combination therapies used with TTFields in various cancer cell lines (organized based on the concomitant treatment used)

| PMID     | First Author    | Year of Publication | Concomitant Treatment (Drug or Radiation)    | Dose                                                                        |
|----------|-----------------|---------------------|----------------------------------------------|-----------------------------------------------------------------------------|
| 31375748 | Kim EH          | 2019                | Chloroquine                                  | 20 mM                                                                       |
| 32144446 | Voloshin T      | 2020                | Chloroquine                                  | 20 $\mu$ M                                                                  |
| 30341282 | Shteingauz A    | 2018                | Chloroquine                                  | 1-27 $\mu$ M (20 $\mu$ M for most experiments)                              |
| 30341282 | Shteingauz A    | 2018                | Vinblastine                                  | 25 nM                                                                       |
| 26658786 | Giladi M        | 2016                | Vinorelbine                                  | 30 nM                                                                       |
| 26658786 | Giladi M        | 2016                | Caspase inhibitor (Z-VAD-FMK)                | 20 $\mu$ M                                                                  |
| 24555979 | Giladi M        | 2014                | Gemcitabine                                  | 0-100 nM                                                                    |
| 24555979 | Giladi M        | 2014                | Irinotecan                                   | 0-100 nM                                                                    |
| 31842288 | Lee YJ          | 2019                | 5 Fluorouracil (5-FU)                        | 5 $\mu$ M                                                                   |
| 24555979 | Giladi M        | 2014                | 5 Fluorouracil (5-FU)                        | 0-1,000 nM                                                                  |
| 29284495 | Giladi M        | 2017                | Bleomycin                                    | 100 $\mu$ g/mL                                                              |
| 28425987 | Silginer M      | 2017                | 3-methyladenine (3-MA)                       | 1 mM                                                                        |
| 31375748 | Kim EH          | 2019                | 3-methyladenine (3-MA)                       | 2 mM                                                                        |
| 30469352 | Jo Y            | 2018                | Sorafenib                                    | 0-20 $\mu$ M                                                                |
| 33163284 | Kim JY          | 2020                | Sorafenib                                    | 0-20 $\mu$ M                                                                |
| 30210815 | Kessler AF      | 2018                | Spindle assembly checkpoint inhibitor (IN-3) | 4 $\mu$ M                                                                   |
| 30669316 | Neuhaus E       | 2019                | Benidipine                                   | 1 $\mu$ M                                                                   |
| 30669316 | Neuhaus E       | 2019                | Nifedipine                                   | 1 $\mu$ M                                                                   |
| 25213867 | Giladi M        | 2014                | Cisplatin                                    | 0.1-100 nM                                                                  |
| 34482104 | Mumblat H       | 2021                | Cisplatin                                    | 80 nM - 10 $\mu$ M                                                          |
| 31707040 | Karanam NK      | 2020                | Cisplatin                                    | H1299 (2 $\mu$ M), A549 (2 $\mu$ M), H157 (1 $\mu$ M), H4006 (0.75 $\mu$ M) |
| 31707040 | Karanam NK      | 2020                | Olaparib                                     | 1, 5, 10, 20, and 40 $\mu$ M                                                |
| 27561100 | Voloshin T      | 2016                | Paclitaxel                                   | 1-100 nM                                                                    |
| 25213867 | Giladi M        | 2014                | Paclitaxel                                   | 0.1-100 nM                                                                  |
| 26658786 | Giladi M        | 2016                | Paclitaxel                                   | 33 nM                                                                       |
| 19133110 | Kirson ED       | 2009                | Paclitaxel                                   | 5.00 nM                                                                     |
| 19133110 | Kirson ED       | 2009                | Paclitaxel                                   | 0.01-1000 nM                                                                |
| 20492723 | Schneiderman RS | 2010                | Paclitaxel                                   | MDA: 5 nM; MCF7: 0.1 $\mu$ M; AA8: 0.1 $\mu$ M                              |
| 26010837 | Gera N          | 2015                | Paclitaxel                                   | 3 $\mu$ M                                                                   |
| 34482104 | Mumblat H       | 2021                | Paclitaxel                                   | 2 nM - 4 $\mu$ M                                                            |
| 28681243 | Chang E         | 2017                | Doxorubicin                                  | 0.1 - 100 $\mu$ M                                                           |
| 20492723 | Schneiderman RS | 2010                | Doxorubicin                                  | 30 $\mu$ M                                                                  |
| 30350219 | Lei KF          | 2018                | Doxorubicin                                  | 0.01 - 10 $\mu$ M                                                           |
| 20492723 | Schneiderman RS | 2010                | Doxorubicin                                  | MDA (0.04 $\mu$ M), MCF7 (0.5 $\mu$ M), AA8 (0.6 $\mu$ M)                   |
| 19133110 | Kirson ED       | 2009                | Doxorubicin                                  | 0.001-10 $\mu$ M                                                            |
| 19133110 | Kirson ED       | 2009                | Cyclophosphamide                             | 0.0001-100 mM                                                               |
| 19133110 | Kirson ED       | 2009                | Doxorubicin                                  | 0.04 $\mu$ M                                                                |
| 19133110 | Kirson ED       | 2009                | Cyclophosphamide                             | 6.60 mM                                                                     |

|          |                  |      |                                                        |                                                                                   |
|----------|------------------|------|--------------------------------------------------------|-----------------------------------------------------------------------------------|
| 19133110 | Kirson ED        | 2009 | Light activated dacarbazine                            | 0.001-100 mM                                                                      |
| 28425987 | Silginer M       | 2017 | Staurosporine                                          | 1 $\mu$ M                                                                         |
| 28425987 | Silginer M       | 2017 | Caspase inhibitor (Z-VAD-FMK)                          | 10 $\mu$ M                                                                        |
| 28425987 | Silginer M       | 2017 | necrostatin-1 (Nec-1)                                  | 100 $\mu$ M                                                                       |
| 27865821 | Clark PA         | 2017 | Temozolomide (TMZ)                                     | 0.1-1,000 $\mu$ M                                                                 |
| 33371210 | Vargas-Toscano A | 2020 | Temozolomide (TMZ)                                     | 0 - 160 $\mu$ M                                                                   |
| 28425987 | Silginer M       | 2017 | Temozolomide (TMZ)                                     | LN-18 (100 $\mu$ M), LN-229 (5 $\mu$ M), T-325 (200 $\mu$ M), ZH-161 (25 $\mu$ M) |
| 31401938 | Park J           | 2019 | Lipopolysaccharide                                     | 1 ng/mL                                                                           |
| 28681243 | Chang E          | 2017 | Withaferin A                                           | 0.1 $\mu$ M                                                                       |
| 25213867 | Giladi M         | 2014 | Pemetrexed                                             | 0-1 nM                                                                            |
| 25213867 | Giladi M         | 2014 | Erlotinib                                              | 0-100 nM                                                                          |
| 32054945 | Yoon YN          | 2020 | Barium titanate nanoparticles (BTNPs), size 100-200 nm | 0-100 $\mu$ g/mL                                                                  |
| 32054945 | Yoon YN          | 2020 | Cytochalasin D                                         | 150 nM                                                                            |
| 32054945 | Yoon YN          | 2020 | Amiloride                                              | 400 $\mu$ M                                                                       |
| 33371210 | Vargas-Toscano A | 2020 | Rapalink 1                                             | 0.42 nM                                                                           |
| 29284495 | Giladi M         | 2017 | Radiation therapy                                      | 0-8 Gy (4 Gy for most experiments)                                                |
| 31707040 | Karanam NK       | 2020 | Radiation therapy                                      | 1, 2, and 4 Gy                                                                    |
| 28425987 | Silginer M       | 2017 | Radiation therapy                                      | LN-18 and LN-229 (3 Gy); T-325 and ZH-161 (5 Gy)                                  |
| 28358361 | Karanam NK       | 2017 | Radiation therapy                                      | 2 and 4 Gy                                                                        |
| 30302280 | Jo Y             | 2019 | Radiation therapy                                      | 2 Gy                                                                              |
| 33074042 | Jo Y             | 2020 | Radiation therapy                                      | 5 Gy                                                                              |
| 34395289 | Linder B         | 2021 | Dexamethasone                                          | 10 g/L                                                                            |
| 34522459 | Kim JS           | 2021 | Trastuzumab                                            | 5 $\mu$ g/mL (total 100 $\mu$ g)                                                  |
| 34804927 | Bai L            | 2021 | Hyperthermia                                           | mild hyperthermia 38.5 C                                                          |
| 35411245 | Jo Y             | 2022 | Hyperthermia                                           | 41 C for 30 min/day                                                               |

**Supplementary Table 3:** TTFields combination therapies in animal models of cancer (organized based on the concomitant treatment used with TTFields)

| PMID     | First Author | Year of Publication | Concomitant Treatment (Drug or Radiation) | Dose              |
|----------|--------------|---------------------|-------------------------------------------|-------------------|
| 24555979 | Giladi M     | 2013                | 5FU                                       | 45 mg/kg          |
|          |              |                     | Gemcitabine                               | 2.5 mg/kg         |
| 25955102 | Castellvi Q  | 2015                | Gemcitabine                               | 100 mg/kg         |
| 30469352 | Jo Y         | 2018                | Sorafenib                                 | 30 mg/kg          |
| 33163284 | Kim JY       | 2020                | Sorafenib                                 | 30 mg/kg          |
| 27561100 | Voloshin T   | 2016                | Paclitaxel                                | 20 mg/kg          |
| 25213867 | Giladi M     | 2014                | Paclitaxel                                | 20 mg/kg          |
| 19133110 | Kirson ED    | 2009                | Paclitaxel                                | 20 mg/kg          |
| 32144446 | Voloshin T   | 2020                | anti-PD-1 ( $\alpha$ PD-1) or Rat IgG2a   | 250 $\mu$ g/mouse |
| 25213867 | Giladi M     | 2014                | Pemetrexed                                | 1 mg/kg           |
|          |              |                     | Cisplatin                                 | 5 mg/kg           |
| 34482104 | Mumblat H    | 2021                | Pemetrexed                                | 5 or 100 mg/kg    |
|          |              |                     | Cisplatin                                 | 1 or 4 mg/kg      |
| 31842288 | Lee YJ       | 2019                | 5-FU                                      | 30 mg/kg          |
| 34522459 | Kim JS       | 2021                | Trastuzumab                               | 150 $\mu$ g       |
| 29284495 | Giladi M     | 2017                | Radiation therapy                         | 2 Gy              |
| 34659907 | Lee WS       | 2021                | Radiation therapy                         | 3 Gy              |



**Supplementary Table 4:** Summary of the clinical trials studying TTFields (\* = completed trial)

| Status or Phase | Clinical trial name | Cancer type                                                      | TTFields frequency (kHz) | Combination therapy                             |
|-----------------|---------------------|------------------------------------------------------------------|--------------------------|-------------------------------------------------|
| Phase 2         | *EF-07              | Newly-diagnosed and recurrent glioblastoma                       | 200                      | Temozolomide or N/A                             |
|                 | *EF-15              | Advanced non-small cell lung cancer                              | 150                      | Pemetrexed                                      |
|                 | *EF-20 (PANOVA)     | Advanced pancreatic adenocarcinoma                               | 150                      | Gemcitabine ( $\pm$ Nab-paclitaxel)             |
|                 | *EF-22 (INNOVATE)   | Recurrent ovarian carcinoma                                      | 200                      | Paclitaxel                                      |
|                 | *EF-30 (HEPANOVA)   | Advanced hepatocellular carcinoma                                | 150                      | Sorafenib                                       |
|                 | EF-31               | Unresectable gastroesophageal junction or gastric adenocarcinoma | 150                      | Oxaliplatin + capecitabine ( $\pm$ trastuzumab) |
|                 | EF-33               | Recurrent glioblastoma                                           | 200                      | N/A (high density TTFields transducer arrays)   |
|                 | EF-36 (KEYNOTE B36) | Advanced non-small cell lung cancer                              | 150                      | Pembrolizumab                                   |
| Phase 3         | EF-24 (LUNAR)       | Stage 4 non-small cell lung cancer following platinum failure    | 150                      | Immune checkpoint inhibitors or docetaxel       |
|                 | EF-25 (METIS)       | 1-10 brain metastases from non-small cell lung cancer            | 150                      | Radiosurgery                                    |
|                 | EF-27 (PANOVA-3)    | Locally-advanced pancreatic adenocarcinoma                       | 150                      | Gemcitabine + Nab-paclitaxel                    |
|                 | EF-28 (INNOVATE-3)  | Recurrent ovarian carcinoma                                      | 200                      | Paclitaxel                                      |
|                 | EF-32 (TRIDENT)     | Newly-diagnosed glioblastoma                                     | 200                      | Radiation + temozolomide                        |
| FDA approved    | *EF-11              | Recurrent glioblastoma                                           | 200                      | N/A                                             |
|                 | *EF-14              | Newly-diagnosed glioblastoma                                     | 200                      | Temozolomide                                    |
|                 | *EF-23 (STELLAR)    | Malignant pleural mesothelioma                                   | 150                      | Pemetrexed + (cisplatin or carboplatin)         |
